# Supplementary material for: Fuse to defuse: a self-limiting ribonuclease-ring nuclease fusion for type III CRISPR defence
Source: PubMed Central journal article supplement (PMC7293037; doi:10.1093/nar/gkaa298), 2020-04-29
Supplement: gkaa298_supplemental_file.pdf [file gkaa298_supplemental_file.pdf]

Csx1-Crn2 1 MEK I L L S F L G K G R Y N E S L Y R L E A E N K K A K S Y L S P L A N A Y L E K E R G N D V E I K F F I T K E V 60  
 WP\_047265937.1 1 M K K I L I V S F L G K G R Y Y E T F Y Y S I E H S E K M V K K R L S P L A N A I L E K E N G N D V E I I F F V T N E V 60  
 WP\_086488314.1 1 M R - - - L I S F L G T G K Y E E T S Y T L - N G Q N C K T K - Y V - - - A A A L M Q L L K - - A D E L T V L A T K E A 50  
 WP\_013905540.1 1 M K - - - L L S F I G S S E Y K E T I Y F Y - E D K T V R T E - Y I - - - Q E A L T K I F Q - - P S E V I I F A T K E A 50

Csx1-Crn2 61 K E N F L E N P N S E H G Q N I N N E I N N L H Q K G I S V T F E N I P E G R N Y N E L E E I I S I I K K S I S E F S E 120  
 WP\_047265937.1 61 K N E F L Y D E N N E Y A K N I L N E L N E I K N Y G I K V S Y R D I P K G K N Y E E L E I I M E E I E K L L L D F K G 120  
 WP\_086488314.1 51 R T - - - - - T H E A S L Q Q E L S R L G L - - V K A E I K D I P S G S N E Q E L W Q Q F E V I R E A T I E K S P 100  
 WP\_013905540.1 51 Y K - - - - - K H G E K L R E R I E N - - - - - V Q F V E I E T P K T Q E D I W S L F E K I V D S - V D Y - N 93

\* H129

Csx1-Crn2 121 K E I I F D L T H G L R H I S T F T T G V I F Y L K N L Q Q D F E E K N I I L Y Y G A Y D I R K E F K N K P P E V P I L 180  
 WP\_047265937.1 121 N K V I F D L T H G L R H M A I F T S S T V F Y F K N L M E K A N K L E M K I V Y G A Y E I G E E I E K N L K K V P I L 180  
 WP\_086488314.1 101 K S I T F D I T L G F R A P P F F A A A I N Y L R N T Q T E - - M P E M H V V Y G E F R - - - - - K D E T N S P I W 152  
 WP\_013905540.1 94 D E I I L D I T H A F R H I P F M S F P I I L Y L Q E V K - - - N V K I V G I Y Y G A F E A K - - - - - T E K G A P I F 145

Csx1-Crn2 181 N I S S T L E L S N L T L A L E E F K E Y G I T K R I E K A L R N I Q K L V A T N K L C N V N K L K F S S L S T E L S N 240  
 WP\_047265937.1 181 D I T Q T L E L S D L T I A L E E F E R Y G I T E R M I I V L K N I Q K I V A K N K L C N L N E L K F S S L S R E L K L 240  
 WP\_086488314.1 153 D L S A F I S L L D W S A L Q N F L K T G H G R L A D L V K Q E N A L L Q K H P S G G R R P T R L S A L V S T L K E 212  
 WP\_013905540.1 146 D L S G I L D L A D W L Y G V R D L K K Y G R G E G I Y N S I K N M N A R F Y K T N A - P K K P K T L S G Y A D L I L I 204

Csx1-Crn2 241 F N N I I - - - - - K I P A S P E K I I N S I L K I K E I L D N S I I E F R N C S K - - - - - S T E K L F F I 285  
 WP\_047265937.1 241 F E E L L - - - - - K I P S P P E K I A N S I Y K I N D I L E S S I R E F K L C S K - - - - - N S E N L F F I 285  
 WP\_086488314.1 213 F S E N I A T V R C S K I I T G D E R S E G S A R K V L K K I E E S R - - - - - D E V K E Y F 254  
 WP\_013905540.1 205 L L K N - - - - - L Q L N Q I P E F M E L S A K A K K G Y E E F K A E A I E F L 239

Csx1-Crn2 286 E P I N Y F L A T L R K I I V E D L F Y N I D S I K N D N T L T R E K I I F M A N F I K L L L K W E M Y S E A M I Q I R 345  
 WP\_047265937.1 286 K P I Q K F L V D F Q K I V L E K L P L D K K I N K Y S N I A T L E K V E F M K N I K L L I N W K M Y S E A V I H L R 345  
 WP\_086488314.1 255 K P L A P I L D S L S E - R L K D L P - - - - - S D S L F G Q A G H D A M S A L A K L Y L D Y E R Y P E A A I V R 306  
 WP\_013905540.1 240 P P I R Y T L N E I E R L - - T E F G - - - - - C K E F G K E S L E K Q L G I I E Y L L E K G M T A N A L E L M R 289

Csx1-Crn2 346 E L L I D L - - - H L L A K G Q - - I L Y Y D D K E K R E R I - F W E D S - - - - - L K R N E I 382  
 WP\_047265937.1 346 E L L I D I - - - K L I E N G K - - Y F Y Y N N K D F R E K - - Y W M Y S Y N I V D - - - - - T K D K E L 386  
 WP\_086488314.1 307 E G W I S L Y D A N V H L S D D Q R - L A Q D K R T N T E K - - C W R D Q E G - - - - - V 343  
 WP\_013905540.1 290 E W I I N A - - - V I F L A G E K K W L S K D V R I K A E K T I G W F S A K I R G N T N G I E K T E W E K L E K N E K 346

\* H402

Csx1-Crn2 383 A E R L D K L T K N I I D T R N K I A H A G R G T D D F - K K E N L 415  
 WP\_047265937.1 387 P K K I E E L L K N V K G W R N S V A H G G R A N T S I - N Q K T L 419  
 WP\_086488314.1 344 G A K K G T G A D T L S N V R N D I E H G G F N E Q P K - P A K T L 376  
 WP\_013905540.1 347 I A K L A K V W L K V Y E I R N A I A H A G M K E K K D R P K V N V 380

\* S452

Csx1-Crn2 416 K K L L L S Y V R E I E E L S N N I E L F E K K E A T L K - R K V Y L L N S I I I P L S K D S - E T G N F D I E K I T K 473  
 WP\_047265937.1 420 E E N L E N A L S M I D E I - - - - - L L S M K D L K V N S K K I Y L L N S T I M P I P K D N - Q E G K F Y I L K L T K 473  
 RKX61510.1 1 - - - - - M I Y I L N T L V I P I D F D K I Q K A R I K V R R I S A 29  
 YP\_319837.1 9 - - - - - Y L L N T L I V P F R D R - - - A K F E I E R V S A 32

\* H495

Csx1-Crn2 474 E K F Y N F L K N A L N E Q T L D S A I G H D S I K H F I K E Q F D L D I P L E R K E I Y F A P G E E A I V I K L E K R 533  
 WP\_047265937.1 474 N E F K V I L E N A I K D D V L D S A I G H E S V I E F I K D K F E L T V P L K R K E I Y F E K G E S A L V I K L E K R 533  
 RKX61510.1 30 E E A K K L L E - - - - K E K F V S A I G H K T T A Q F L S E L L G M E I E M N R R T V F M E P G D K A I H L F L K E R 85  
 YP\_319837.1 33 E E A K K I I Q - - M H N S Q F V S A I G H S A S A N A L S L L L G V A V P V N R T E V F F N V G D E A I A M A L K K R 90

Csx1-Crn2 534 P E E G K I Y - T K E E M D Y M E E N N L I G Y - - Y Y I K R K F 563  
 WP\_047265937.1 534 P E E G K I Y - T K E E M D F M E E N N L I G Y - - Y Y I Y R E G 563  
 RKX61510.1 86 L P E G K I L - S E E M K - - - - - S V K Y - - W L V L S E I E V E K 113  
 YP\_319837.1 91 L A E G Q V L R T V Q E L E - - - - - A V G F D L Y Y I K R V Q 117

**Supplementary figure 1. Multiple sequence alignment of Csx1-Crn2 with selected homologues.**

*M. piezophila* Csx1-Crn2 is aligned with the sole bifunctional homologue in NCBI, WP\_047265937.1 from a related strain; with Csx1 homologues from *Thioflexothrix pseukupsi* (WP\_086488314.1) and *Pyrococcus yayanosii* (WP\_013905540.1); and with Crn2 homologues from *Thermodesulfobacteria* bacterium (RKX61510) and *Acidianus* two-tailed virus (YP\_319837.1). Residues mutated in this study are indicated.

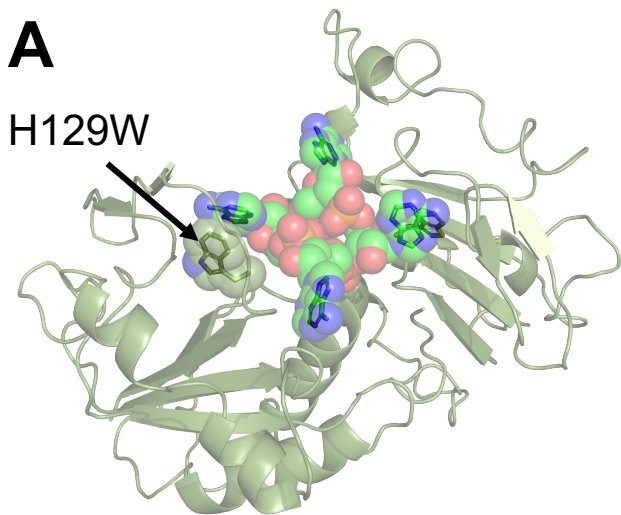

CARF domain

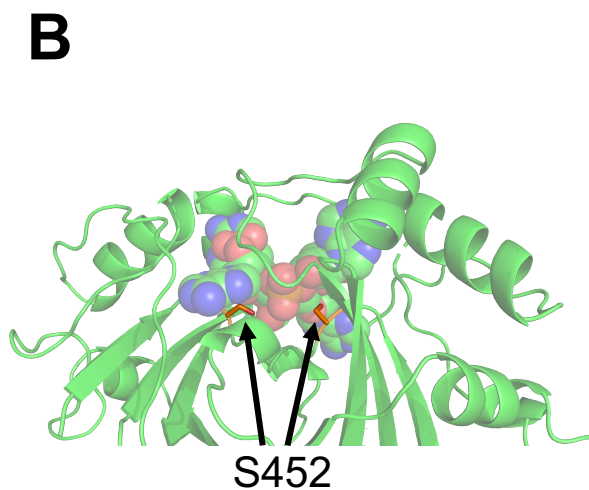

Crn2 domain

**Supplementary figure 2. Mutations designed to abolish cA<sub>4</sub> binding in the CARF and Crn2 domains.** **A** The CARF domain of the Csx1-Crn2 structure model is shown with cA<sub>4</sub> bound, based on the structure of Csx1 from *S. islandicus* (PDB 6R7B). Mutation of H129 to a tryptophan is predicted to result in a steric clash with the adenine base of cA<sub>4</sub>. **B** The Crn2 domain of the Csx1-Crn2 structure model is shown with cA<sub>4</sub> bound, based on the structure of AcrIII-1 from SIRV1 (PDB 6SCF). S452 is conserved in the Crn2 family and mutation to a bulkier tyrosine residue is predicted to block cA<sub>4</sub> binding. Colouring is consistent with that used in Figure 1.
